# Supplementary material for: Biological Invasions Affect Resource Processing in Aquatic Ecosystems: The Invasive Amphipod Dikerogammarus villosus Impacts Detritus Processing through High Abundance Rather than Differential Response to Temperature
Source: MDPI journal article supplement (doi:10.3390/biology12060830), 2023-06-07
Supplement: s1 [file s1]

**Supplementary table S1.** Parametric coefficients of GAM for shredding experiment

| Factor                                              | Estimate | SE   | t value | p value |
|-----------------------------------------------------|----------|------|---------|---------|
| <i>D. villosus</i> vs <i>G. pulex</i>               | -1.20    | 0.10 | -12.09  | <0.001  |
| Unparasitised <i>G. pulex</i> vs <i>D. villosus</i> | -0.27    | 0.10 | -2.70   | 0.007   |
| Parasitised <i>G. pulex</i> vs <i>D. villosus</i>   | -0.40    | 0.10 | -3.90   | <0.001  |
| Temperature                                         | -0.05    | 0.01 | -8.81   | <0.001  |
| Unparasitised <i>G. pulex</i> x temp                | -0.02    | 0.01 | -2.33   | 0.02    |
| Parasitised <i>G. pulex</i> x temp                  | 0.01     | 0.01 | 0.59    | 0.56    |
